# Supplementary material for: Distinct populations of antigen specific tissue resident CD8 T cells in human cervix mucosa
Source: JCI journal article supplement (doi:10.1172/jci.insight.149950), 2021-06-22
Supplement: sd1 [file 1]

**Supplementary Table 1**

| Cervix biopsy code | Target Name | Copies/reaction | Target Name | Copies/reaction |
|--------------------|-------------|-----------------|-------------|-----------------|
| C8.1               | HSV         | 4.43            | beta globin | 4,396.93        |
| C8.2               | HSV         | Undetectable    | beta globin | 2,784.81        |
| C7.2               | HSV         | 2.35            | beta globin | 3,932.73        |
| C5                 | HSV         | Undetectable    | beta globin | 4,613.60        |
| C1                 | HSV         | Undetectable    | beta globin | 6,074.39        |

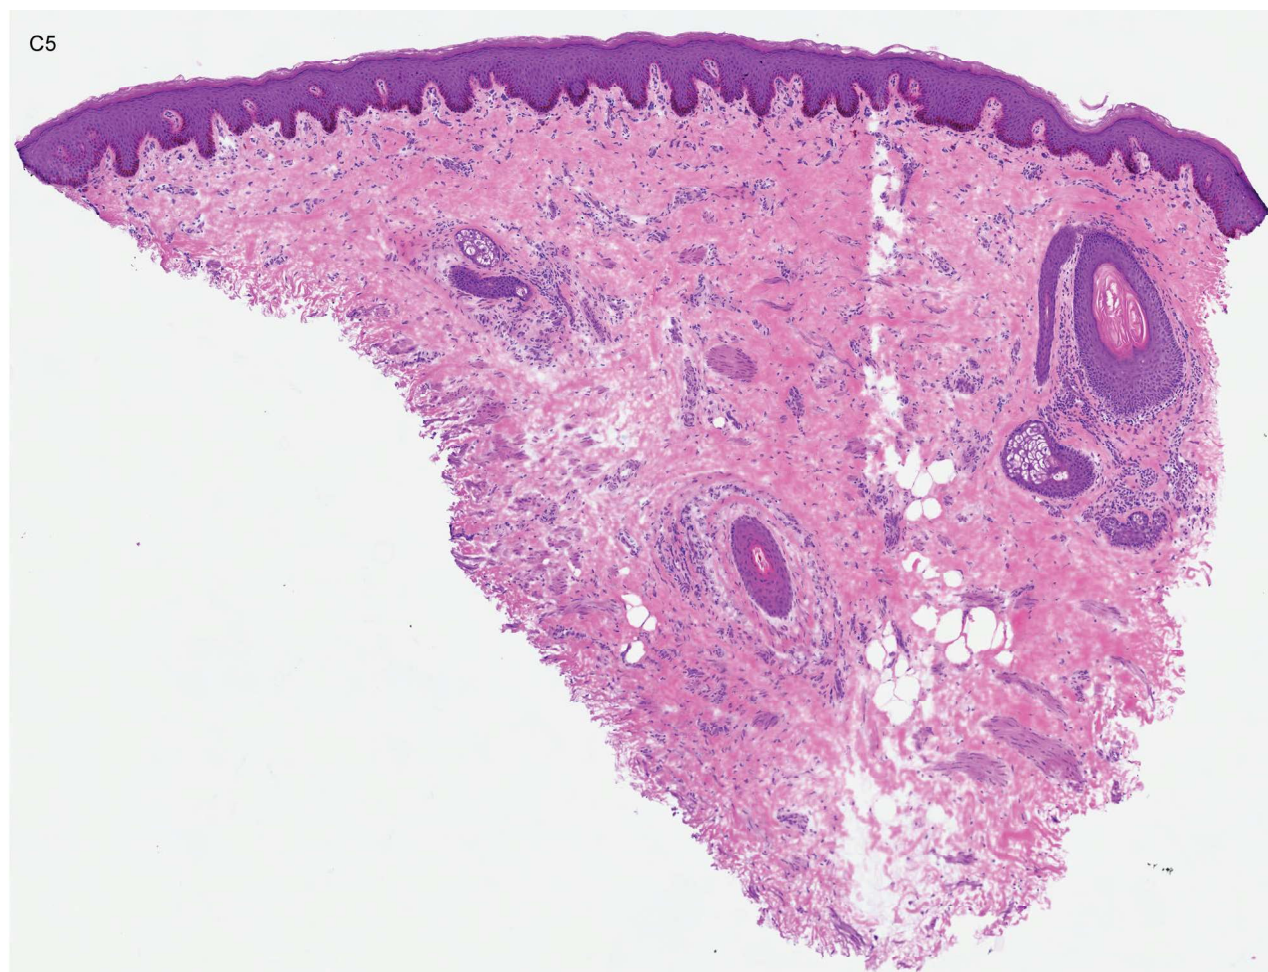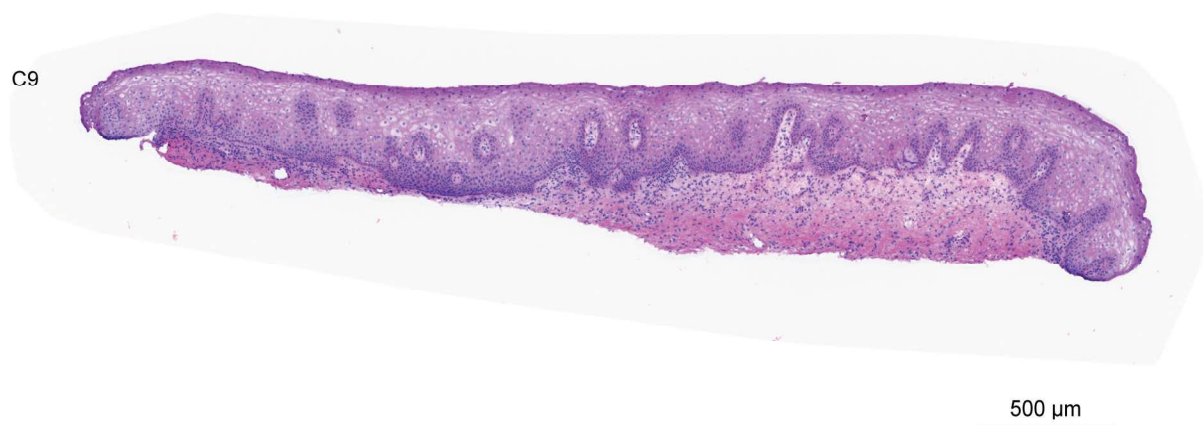

**Supplementary Figure 1.** H&E staining of the human cervix (C5 and C9).

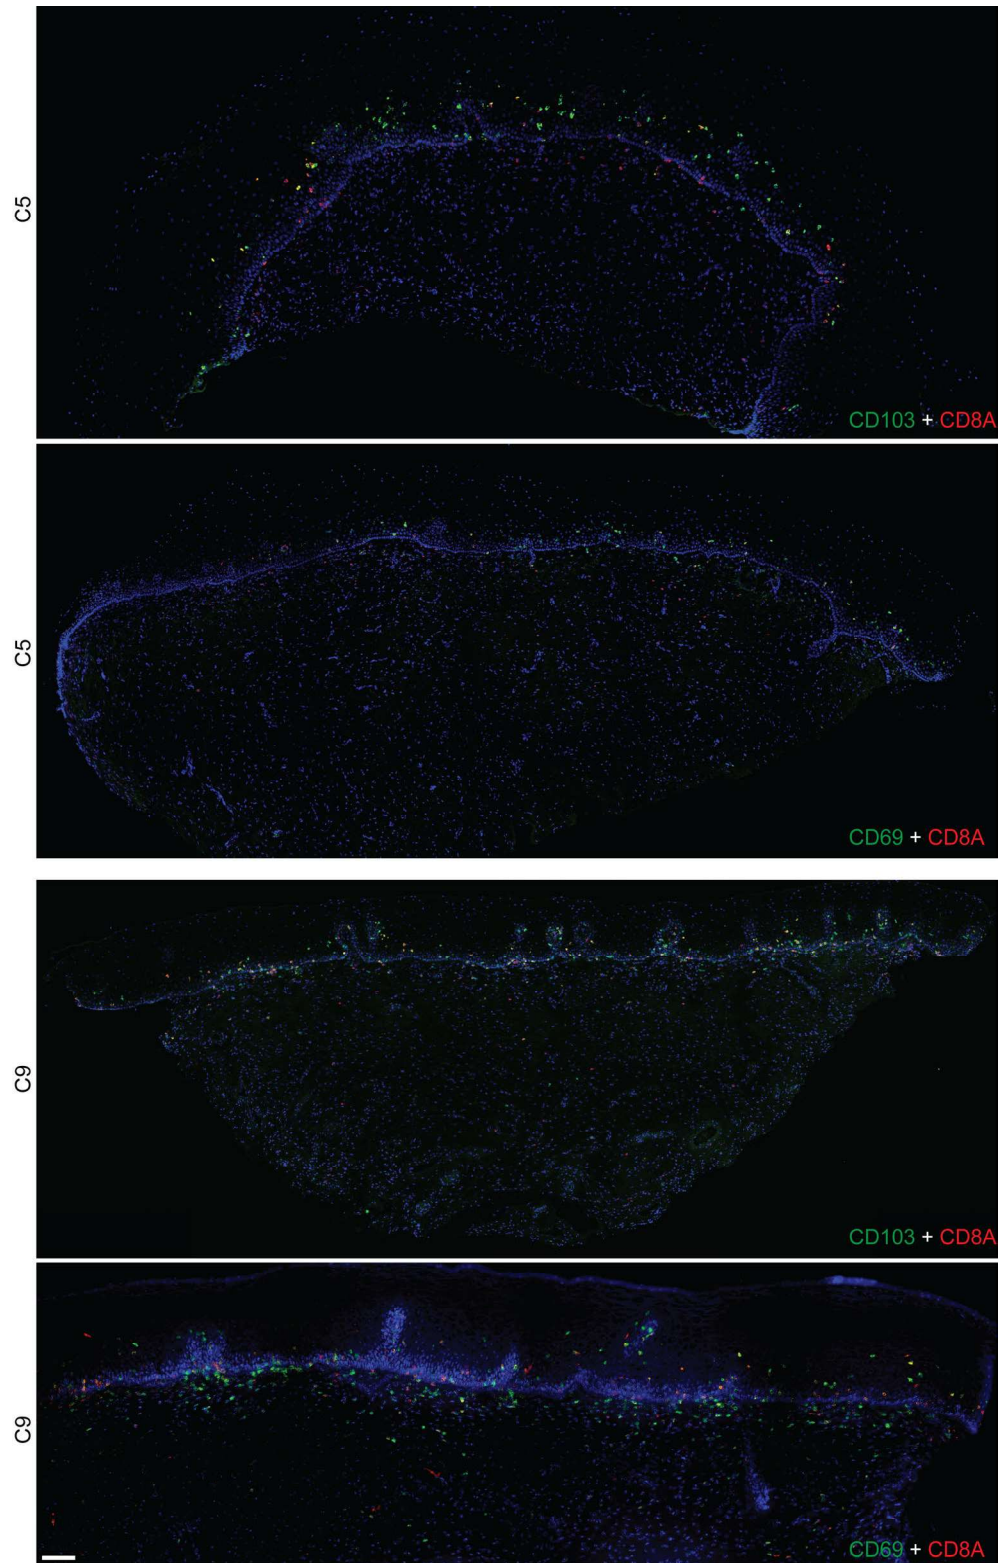

**Supplementary Figure 2.** Double immunofluorescent staining of cervix biopsies (C5 and C9) with CD8A and CD103 antibodies, or CD8A and CD69 antibodies. Images for the whole slides were shown. Scale bar = 100  $\mu$ m.
